# Supplementary material for: Impact of Postoperative Changes in Brain Anatomy on Target Volume Delineation for High-Grade Glioma
Source: MDPI journal article supplement (doi:10.3390/cancers15102840), 2023-05-19
Supplement: s1 [file s1]

## SUPPLEMENT

**Supplement Table S1** Overview of individual patient and MRI characteristics ( $n = 28$ ).

MRI = magnetic resonance imaging; f = female; m = male; gbm = glioblastoma; odg = oligodendroglioma; FLAIR = fluid-attenuated inversion recovery.

\* There was no subdural haematoma in MRI 1 for this patient.

| patient | sex | age (years) | interval MRI<br>1–2 (days) | diagnosis | tumour<br>location | $\Delta$ resection<br>cavity<br>(cm <sup>3</sup> ) | $\Delta$ resection<br>cavity<br>(%) | $\Delta$ FLAIR<br>(cm <sup>3</sup> ) | $\Delta$ FLAIR<br>(%) | $\Delta$ resection<br>cavity + FLAIR<br>(cm <sup>3</sup> ) | $\Delta$ resection<br>cavity + FLAIR<br>(%) | $\Delta$ haematoma<br>(mm) | $\Delta$ haematoma<br>(%) |
|---------|-----|-------------|----------------------------|-----------|--------------------|----------------------------------------------------|-------------------------------------|--------------------------------------|-----------------------|------------------------------------------------------------|---------------------------------------------|----------------------------|---------------------------|
| 1       | f   | 66          | 11                         | gbm       | frontal            | −4.1                                               | −25.8%                              | −31.0                                | −42.9%                | −20.0                                                      | −31.5%                                      | +3.4                       | +60.7%                    |
| 2       | m   | 59          | 12                         | gbm       | frontal            | −3.9                                               | −13.9%                              | −15.7                                | −18.5%                | −32.0                                                      | −22.3%                                      | −2.6                       | −23.9%                    |
| 3       | m   | 55          | 21                         | gbm       | frontal            | −20.2                                              | −27.4%                              | −29.4                                | −17.4%                | +5.7                                                       | +4.0%                                       | −2.6                       | −100.0%                   |
| 4       | f   | 69          | 21                         | gbm       | frontal            | +8.5                                               | +93.4%                              | −85.0                                | −59.4%                | −94.9                                                      | −67.1%                                      | −2.6                       | −30.2%                    |
| 5       | m   | 76          | 21                         | gbm       | parietal           | +17.6                                              | +110.7%                             | +0.5                                 | +0.2%                 | −30.1                                                      | −13.0%                                      | −5.5                       | −50.5%                    |
| 6       | m   | 64          | 17                         | gbm       | frontal            | −5.1                                               | −11.9%                              | −36.0                                | −23.8%                | −106.5                                                     | −64.4%                                      | −0.6                       | −5.1%                     |
| 7       | f   | 34          | 20                         | gbm       | frontal            | +10.3                                              | +37.9%                              | −9.3                                 | −10.8%                | +18.7                                                      | +42.0%                                      | +0.0                       | +0.0%                     |
| 8       | f   | 51          | 15                         | gbm       | temporal           | −9.2                                               | −16.1%                              | −10.5                                | −7.9%                 | +4.3                                                       | +6.8%                                       | −4.1                       | −33.6%                    |
| 9       | m   | 50          | 35                         | gbm       | occipital          | −0.6                                               | −9.8%                               | −23.4                                | −51.4%                | −21.2                                                      | −46.9%                                      | −0.6                       | −19.4%                    |
| 10      | m   | 52          | 50                         | odg       | frontal            | +3.4                                               | +16.5%                              | −3.9                                 | −6.6%                 | −31.4                                                      | −42.7%                                      | −2.2                       | −48.9%                    |
| 11      | m   | 67          | 16                         | gbm       | parietal           | +67.8                                              | +174.3%                             | −3.8                                 | −1.4%                 | +8.1                                                       | +3.1%                                       | +4.1                       | *                         |
| 12      | m   | 62          | 20                         | gbm       | temporal           | +1.6                                               | +7.2%                               | −68.8                                | −55.6%                | −69.6                                                      | −58.7%                                      | −2.8                       | −65.1%                    |
| 13      | m   | 78          | 11                         | gbm       | parietal           | +12.0                                              | +65.8%                              | −9.9                                 | −15.5%                | −21.4                                                      | −29.3%                                      | +5.7                       | +101.8%                   |
| 14      | m   | 78          | 17                         | gbm       | parietal           | −2.7                                               | −11.6%                              | −145.7                               | −75.4%                | −42.1                                                      | −50.6%                                      | −1.5                       | −11.1%                    |
| 15      | m   | 26          | 18                         | gbm       | frontal            | −18.6                                              | −59.4%                              | −105.4                               | −72.0%                | −24.9                                                      | −29.7%                                      | −9.7                       | −56.7%                    |

|    |   |    |    |     |          |       |        |        |        |        |        |      |         |
|----|---|----|----|-----|----------|-------|--------|--------|--------|--------|--------|------|---------|
| 16 | m | 63 | 19 | gbm | frontal  | +13.4 | +21.7% | −166.2 | −62.9% | −70.6  | −34.9% | −0.7 | −9.3%   |
| 17 | m | 48 | 22 | gbm | frontal  | −7.5  | −21.8% | −15.4  | −14.9% | −5.3   | −7.7%  | −2.9 | −36.7%  |
| 18 | m | 65 | 18 | gbm | parietal | +1.7  | +27.4% | −16.9  | −39.0% | +2.9   | +15.3% | −6.0 | −44.8%  |
| 19 | m | 46 | 11 | gbm | temporal | +7.0  | +22.5% | −9.0   | −14.8% | −3.5   | −6.3%  | +1.1 | +14.9%  |
| 20 | m | 60 | 22 | gbm | temporal | +7.1  | +27.3% | −34.5  | −43.5% | −25.3  | −29.5% | −6.9 | −39.9%  |
| 21 | f | 77 | 17 | gbm | temporal | +11.6 | +55.0% | −54.8  | −49.4% | −41.3  | −35.8% | −1.3 | −9.8%   |
| 22 | f | 67 | 22 | gbm | parietal | −11.5 | −56.1% | −92.5  | −60.6% | −92.1  | −58.8% | −1.9 | −13.8%  |
| 23 | f | 41 | 20 | odg | frontal  | −4.5  | −20.8% | −6.1   | −14.2% | −22.2  | −32.7% | +1.8 | +31.6%  |
| 24 | m | 70 | 8  | gbm | frontal  | −10.2 | −26.8% | −89.3  | −55.8% | −78.2  | −53.7% | +5.3 | +76.8%  |
| 25 | f | 53 | 14 | gbm | frontal  | −7.4  | −13.7% | −75.7  | −52.1% | −55.7  | −35.3% | +0.0 | +0.0%   |
| 26 | f | 60 | 28 | gbm | parietal | −2.0  | −23.5% | −92.7  | −86.3% | −86.6  | −88.5% | −4.1 | −41.8%  |
| 27 | m | 73 | 22 | gbm | temporal | −15.8 | −30.5% | −69.0  | −55.7% | −117.8 | −64.5% | +5.0 | +100.0% |
| 28 | f | 59 | 26 | gbm | temporal | −3.1  | −37.1% | −14.8  | −56.7% | −13.8  | −63.6% | −3.5 | −30.2%  |
